# Supplementary material for: Inhibition of lncRNA SNHG8 plays a protective role in hypoxia-ischemia-reoxygenation-induced myocardial injury by regulating miR-335 and RASA1 expression
Source: PubMed Central journal article supplement — Mol Med Rep. 2021 Jun 22;24(2):597. doi: 10.3892/mmr.2021.12236 (PMC8240175; doi:10.3892/mmr.2021.12236), 2021-06-22
Supplement: Supplementary_Data.pdf [file Supplementary_Data.pdf]

Figure S1. Efficacy of *SNHG8* siRNA, miR-335 mimic, inhibitor, RASA1 siRNA and overexpression plasmid transfections were determined by reverse transcription-quantitative PCR. \*\*\* $P < 0.001$  vs. Control; \*\* $P < 0.01$  vs. NC mimic, \*\*\* $P < 0.001$  vs. NC inhibitor; \*\* $P < 0.01$  vs. NC siRNA, \* $P < 0.05$  vs. NC plasmid. miR, microRNA; NC, negative control; RASA1, RAS p21 protein activator 1; siRNA, small interfering RNA; *SNHG8*, small nucleolar RNA host gene 8.

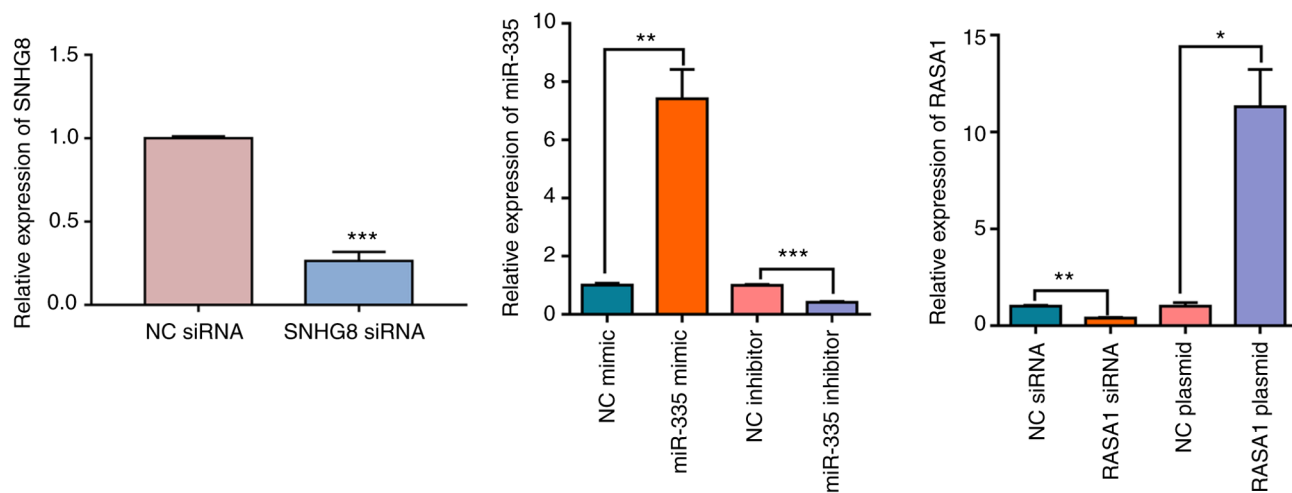

Figure S2. Expression of miR-335 was determined after HI/R induction and analyzed the relationship between miR-335 and RASA. (A) The expression of miRNAs was determined in the control and HI/R group by reverse transcription-quantitative PCR. (B) TargetScan and miRTarBase were used to screen predicted target genes of rno-miR-335. (C) Cell Counting Kit-8 assay determined cell viability in different groups. \*\* $P < 0.01$ , \*\*\* $P < 0.001$  vs. Control. HI/R, hypoxia-ischemia-reoxygenation; miR/miRNA, microRNA; RASA1, RAS p21 protein activator 1; rno, *Rattus norvegicus*; *SNHG8*, small nucleolar RNA host gene 8; si, small interfering.

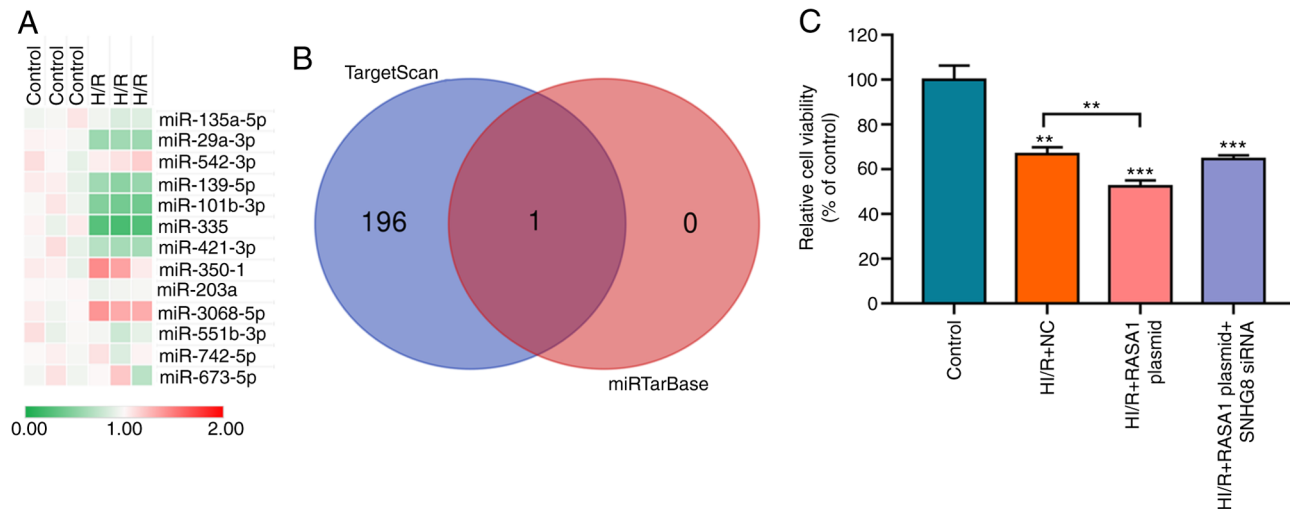

Table SI. Primer sequences used for reverse transcription-quantitative PCR.

| Name               | Sequence                                                                     |
|--------------------|------------------------------------------------------------------------------|
| <i>RMRP</i>        | Forward 5'-ACTCCAAAGTCCGCCAAGA-3';<br>Reverse 5'-TGCGTAACTAGAGGGAGCTGAC-3'   |
| <i>TUG1</i>        | Forward 5'-TACGTCCCGTGCCTCCTGAT-3'<br>Reverse 5'-AGGGCTGTGCTGAATCTGGG-3'     |
| <i>ZFAS1</i>       | Forward 5'-ACGTGCAGACATCTACAACCT-3'<br>Reverse 5'-TACTTCCAACACCCGCAT-3'      |
| <i>NRF</i>         | Forward 5'-TAGCCCATCTCGTACCATCAC-3'<br>Reverse 5'-TTTGTTCACCTCTCCATCAG-3'    |
| <i>HRIM</i>        | Forward 5'-GATTAGCTAGTCAAGGGCGGG-3'<br>Reverse 5'-TCACCCACCCAAGTGTCAAG-3'    |
| <i>FOXD3-AS1</i>   | Forward 5'-GGTGGAGGAGGCGAGGATG-3'<br>Reverse 5'-AGCGGACAGACAGGGATTGG-3'      |
| <i>HOTAIR</i>      | Forward 5'-GTTAACATGACCAGCGATCTGA-3'<br>Reverse 5'-AATTAATTAGTGCCTCCAGTCC-3' |
| <i>FTX</i>         | Forward 5'-ATCTTCTTGCGCTCCTCCTT-3'<br>Reverse 5'-TGTGTCCAGGGCTGTCTGT-3'      |
| <i>MDRL</i>        | Forward 5'-CTCCTGCGCTTTAATTTCAA-3'<br>Reverse 5'-TGGCTCTTCCGTAGTTGATGA-3'    |
| <i>SLC8A1-AS1</i>  | Forward 5'-ACACTGGGCTGATGTGCAAG-3'<br>Reverse 5'-GACTCAGTGACAGGGCTCAA-3'     |
| <i>miR-29a-3p</i>  | 5'-TAGCACCATCTGAAATCGGTTA-3'                                                 |
| <i>miR-542-3p</i>  | 5'-TGTGACAGATTGATAACTGAAA-3'                                                 |
| <i>miR-139-5p</i>  | 5'-TCTACAGTGCACGTGTCTCCAG-3'                                                 |
| <i>miR-101b-3p</i> | 5'-TACAGTACTGTGATAGCTGAA-3'                                                  |
| <i>miR-421-3p</i>  | 5'-ATCAACAGACATTAATTGGG-3'                                                   |
| <i>miR-350-1</i>   | 5'-TTCACAAAGCCCATACACTTTCAC-3'                                               |
| <i>miR-203a</i>    | 5'-AGTGGTTCTTAACAGTTCAAC-3'                                                  |
| <i>miR-3068-5p</i> | 5'-AGTGGTTCTTAACAGTTCAAC-3'                                                  |
| <i>miR-551b-3p</i> | 5'-GGCGACCCATACTTGGTTTCAGT-3'                                                |
| <i>miR-742-5p</i>  | 5'-TACTCACATGGTTGCTAATCA-3'                                                  |
| <i>miR-673-5p</i>  | 5'-CTCACAGCTCCGGTCTGGAG-3'                                                   |
